# Supplementary material
Source: PubMed Central journal article supplement (PMC3718022)

## SUPPLEMENTARY MATERIAL

**Table S1.** Mean Ct (threshold cycle) of *Sra-hsp-17.1* and *Sra-hsp-17.2* compared to the housekeeping control gene, *Sra-gapdh* in iL3, parasitic and free-living *S. ratti* female stages.

The data were expressed for two independent experiments. Ct values are means  $\pm$  S.D.

| Stage | <i>Sra-gapdh</i>    | <i>Sra-hsp-17.1</i>  | <i>Sra-hsp-17.2</i>  |
|-------|---------------------|----------------------|----------------------|
| iL3   | 15,365 $\pm$ 0,1341 | 20,5433 $\pm$ 0,0273 | 26,8967 $\pm$ 0,0103 |
| PF    | 15,4 $\pm$ 0,0782   | 15,6233 $\pm$ 0,0121 | 19,1833 $\pm$ 0,0288 |
| FF    | 15,3767 $\pm$ 0,304 | 18,04 $\pm$ 0,041    | 22,06 $\pm$ 0,0434   |

**Table S2.** List of nucleotide primers

| Primer name   | 5' - 3' sequence                              |
|---------------|-----------------------------------------------|
| Oligo dT-T7I  | GAGAGAGGATCCAAGTACTAATACGACTCACTATAGGGAGATT24 |
| Oligo dT-T7II | GAGAGAGGATCCAAGTACTAATACGACTCACTATAGG         |
| SL-1          | GGTTTAATTACCCAAGTTTGAG                        |
| af1           | ATGAACGACCGTTGGATGA                           |
| ar1           | TTATTTTCTATATTCAATTGGGAC                      |
| bf1           | ATGTTTGACAACCACATGATGACACC                    |
| br1           | TTACTTAAACTTGATAGGAATATTTTTTCCC               |
| af2           | AACGACAAGGAATTCAGAGTCAA                       |
| bf2           | CCATTCACTCGTATGCCACTT                         |
| ar2           | ACGGACGAAACTTCTTTGGA                          |
| br2           | TGGGTGGGTGTCAGCAAAT                           |
| af3           | AACGACAAGGAATTCAGAGTCAA                       |
| ar3           | ACGGACGAAACTTCTTTGGA                          |
| bf3           | CCATTCACTCGTATGCCACTT                         |
| br3           | TGGGTGGGTGTCAGCAAAT                           |
| af4           | AAGCTTgatgatgatgataaaATGAACGACCG              |
| ar4           | GGATCCTTATTTTCTATATTCAATTGGGAC                |
| bf4           | CATATGgatgatgatgataaaATGTTTGACAAC             |
| br4           | GGATCCTTACTTAAACTTGATAGG                      |
| gapdhf        | GTACCACTAACTGTTTAGCTCC                        |
| gapdhr        | GCACCTCTCCATCTCTCC                            |
| PJC45f        | ATACGACTCACTATAGGGGAATTG                      |

**Fig. S1. (A)** SDS-PAGE of excretory/secretory products from *S. rattii* PF after 250-fold concentration and mass spectrometric data analyses by ProteinPilot search engine v2.0.1, identifying *Sra*-HSP-17s peptides, in the respective 18-19 kDa-excised protein band. UPS= unused protein score. **(B)** SDS-PAGE of excretory/secretory products from *S. rattii* PF after inhibition of protein release by 70  $\mu$ M cycloheximide.

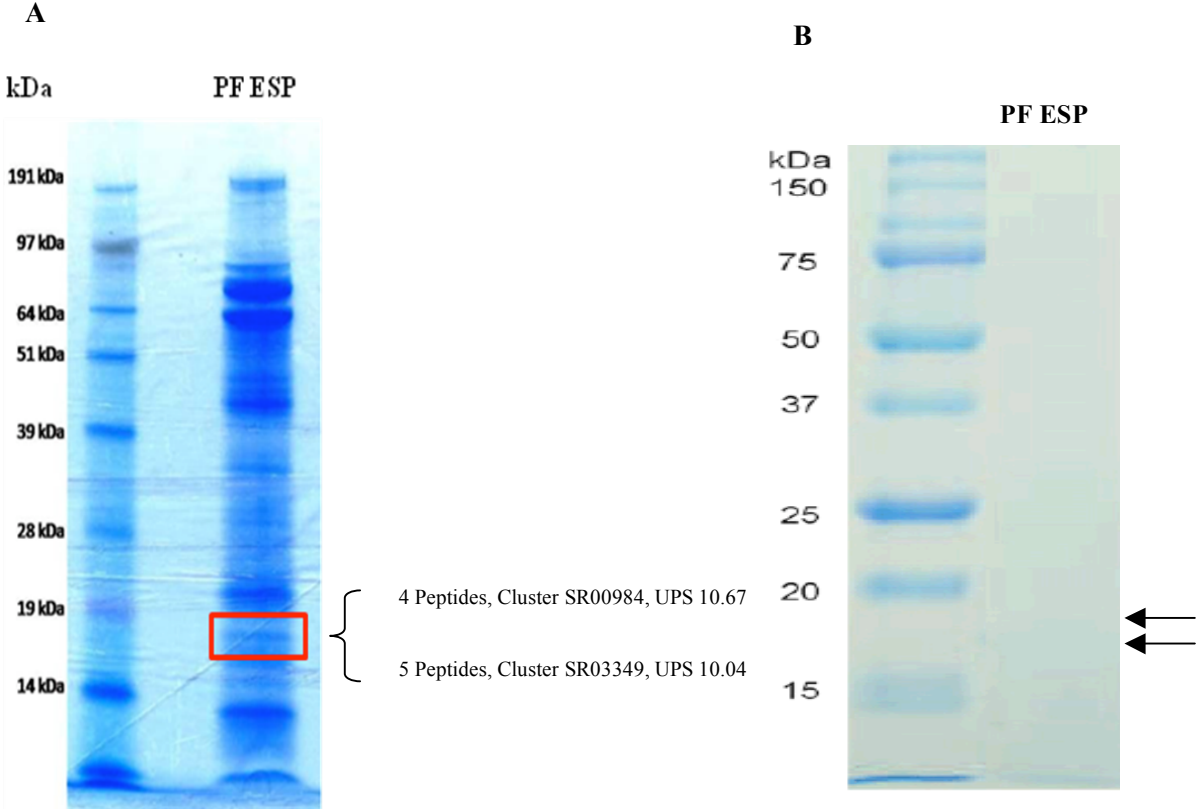

**Fig. S2.** Sequence identification. (A) Alignment of the two *hsp-17* clusters identified by ProteinPilot search engine v2.0.1 from the ESP of the PF (SR03349 and SR00984) and a third alternative cluster SR01014. Symbols: identical residues are shaded in black blocks, conserved residues in two clusters are shaded in grey. (B) Alignment of *Cel-hsp-17a* (acc. No Q20660) and *Cel-hsp-17b* (acc. No Q7JP52) isoforms (differ nucleotides are in bounder). (C) Alignment of the identified full length cDNAs of *Sra-hsp-17.1* and *Sra-hsp-17.2*. Identical residues underlined with asterisks.

|         |                                                                      | Identity to SR03349 |
|---------|----------------------------------------------------------------------|---------------------|
| SR03349 | -----ACCACATAAGTTATTAAATATTTCT                                       | 25 (100%)           |
| SR01014 | ACATCTATATAAAACAACATATTTTTTCCATTTTATCACCACATAAGTTATTATAATTTCT        | 60 (98%)            |
| SR00984 | -----GTTATTGTGT-----                                                 | 12 (64%)            |
| SR03349 | <b>ACTGATATTTTTGCTACGAAAGTTTTGCTATTTATTATTCGCTATCTTTGACAACCAC</b>    | 85                  |
| SR01014 | <b>ACTGATATTTTTGCTACGAAAGTTTTGCTATTTATTATTCGCTATCTTTGACAACCAC</b>    | 120                 |
| SR00984 | <b>ATAAACATTTTTCTATCTTGTACTCTACTGTCTTTTAATC---ATG---AACACCCT</b>     | 65                  |
| SR03349 | <b>ATGATGACACCATTCACTCGTATGCCACTTACCTCCTGTCCCTACAACAGTA-AGTACGT</b>  | 144                 |
| SR01014 | <b>ATGATGACACCATTTACTCGTATGCCACTTACCTCCTGTCCCTACAACAGTA-AGTACGT</b>  | 179                 |
| SR00984 | <b>TGATGACTCCATTGTCCGCTGATCCTCTCTGTGTGTC--ATTAGGATACGGTGGAC</b>      | 123                 |
| SR03349 | <b>CAATGAAT-----GGAT---CGTCTATGAAACGCTACATGGCTAATACTCTTT-</b>        | 191                 |
| SR01014 | <b>TAATGAAT-----GGAT---CGTCTATGAAACGCTACATGGCTAATACTCTTT-</b>        | 226                 |
| SR00984 | <b>CAGCAAACCTCTTCAACGAGATGAACATGT--TGGAGCGCAATGATGAACTCCCTCAA</b>    | 181                 |
| SR03349 | <b>CATGGGCAACA-AATCTCTTATGGAAAGCCATAAATTTGCTGACACCACCCAGATAAT</b>    | 250                 |
| SR01014 | <b>CATGGGCAACA-AATCTCTTATGGAAAGCCATAAATTTGCTGACACCACCCAGATAAT</b>    | 285                 |
| SR00984 | <b>CATGGTTGATCSTAATCTC--ACCAACACATGGAACTTATGAAACATGTCCAGAGGTA</b>    | 239                 |
| SR03349 | <b>ATCGACAATGACAAGGAATTCAAAGTCAAAGATGGACGTATCACACTTTAGTCCAGATGAA</b> | 310                 |
| SR01014 | <b>ATCGACAATGACAAGGAATTCAAAGTCAAAGATGGACGTATCACACTTTAGTCCAGATGAA</b> | 345                 |
| SR00984 | <b>GTAAATACGACAAGGAATTCAGTCAAATGGATGTATCTCACTATGACCAATGAA</b>        | 299                 |
| SR03349 | <b>TTGAAAGTCACTTTCAGAGATGGATACCTCCAAGTTGAAGGTAATCATGAAGAGAAGACT</b>  | 370                 |
| SR01014 | <b>TTGAAAGTCACTTTCAGAGATGGATACCTCCAAGTTGAAGGTAATCATGAAGAGAAGACT</b>  | 405                 |
| SR00984 | <b>TTGAAAGTCACTTTCAGAGATGGATACCTCCAAGTTGAAGGTAATCATGAAGAGAAGACT</b>  | 359                 |
| SR03349 | <b>GACAAATATGGAACCATCCAAAGAAGCTTTGTAAAGAACTATTTCTTTACCACCAAACTTC</b> | 430                 |
| SR01014 | <b>GACAAATATGGAACCATCCAAAGAAGCTTTGTAAAGAACTATTTCTTTACCACCAAACTTC</b> | 465                 |
| SR00984 | <b>GACAAATACGGAACCATCCAAAGAAGCTTTCGTCCGTAAATATGCTCTCCAAAGGACTC</b>   | 419                 |
| SR03349 | <b>AATGAAGACCGACTCCGTCTGTGAGATTTCAAAGGATGGTGTTTAACTGTTGGAGTTGCC</b>  | 490                 |
| SR01014 | <b>AATGAAGACCGACTCCGTCTGTGAGATTTCAAAGGATGGTGTTTAACTGTTGGAGTTGCC</b>  | 525                 |
| SR00984 | <b>ACAGAGGAGATGTCAAAAGTGAACCTTACTAAGGACGGTGTCTTACAGTCCGGAGGTAA</b>   | 479                 |
| SR03349 | <b>AAACTTGCCATCGGAGAGAAAAGGGGAAAAATATTCCTATCAAGTTTAAAGTAAAAGATT</b>  | 550                 |
| SR01014 | <b>AAACTTGCCATCGGAGAGAAAAGGGGAAAAATATTCCTATCAAGTTTAAAGTAAAAGATT</b>  | 585                 |
| SR00984 | <b>AAAGATGGCTATTGAGGACAAGAAATGTCACACTGTCCTCAATGTAATAAGAAATAAGTG</b>  | 539                 |
| SR03349 | <b>AAAT-ATTATATAATGAGTTTTTATTTCTTTTGACC---ATGNNN-----</b>            | 591                 |
| SR01014 | <b>AAAT-ATTATATAATGAGTTTTTATTTCTTTTGACC---ATGTTATACGGTAAAGTTCTA</b>  | 641                 |
| SR00984 | <b>AGATTATTTTATAATGTTGATTTAAATTTATTTATCTATATATTTTT-----TTATT</b>     | 591                 |
| SR03349 | -----                                                                |                     |
| SR01014 | <b>TTATGATGCT--TTTTGTAGTTCTTTCTACAAAATAAATGTCGAAATTTTTAAA</b>        | 695                 |
| SR00984 | <b>TTATGGACTAATTTCTGTAGCCTTT-----AAATAAAAATCTTTACGTAATAA</b>         | 640                 |

**B**

*Cel-hsp-17a* ATGGATCGTCGTTTTCCACCATTCTCCCATTTCTTTAACCATGGCCSCAGATTCTTCGAT 60  
*Cel-hsp-17b* ATGGATCGTCGTTTTCCACCATTCTCCCATTTCTTTAACCATGGCC---GATTCCTTCGAT 57  
\*\*\*\*\*

*Cel-hsp-17a* GACGTCGACTTTGATCGCCACATGATCCGACCATACTGGGCCGATCAAACAATGCTCACT 120  
*Cel-hsp-17b* GACGTCGACTTTGATCGCCACATGATCCGACCATACTGGGCCGATCAAACAATGCTCACT 117  
\*\*\*\*\*

*Cel-hsp-17a* GGACACCGAGTAGGAGATGCTATTGATGTTGTGAACAACGATCAAGAATACAATGTATCT 180  
*Cel-hsp-17b* GGACACCGAGTAGGAGATGCTATTGATGTTGTGAACAACGATCAAGAATACAATGTATCT 177  
\*\*\*\*\*

*Cel-hsp-17a* GTAGATGTTTCACAGTTTGAACCAGAAGAGTTGAAAGTGAACATTGTTGATAATCAGCTA 240  
*Cel-hsp-17b* GTAGATGTTTCACAGTTTGAACCAGAAGAGTTGAAAGTGAACATTGTTGATAATCAGCTA 237  
\*\*\*\*\*

*Cel-hsp-17a* ATCATCGAAGGAAAGCATAACGAGAAGACTGATAAATATGGACAGGTAGAGCGTCACTTT 300  
*Cel-hsp-17b* ATCATCGAAGGAAAGCATAACGAGAAGACTGATAAATATGGACAGGTAGAGCGTCACTTT 297  
\*\*\*\*\*

*Cel-hsp-17a* GTCCGGAAGTATAACCTTCCAACAGGGGTCCGTCCAGAACAATCAAGTCCGAATTGAGC 360  
*Cel-hsp-17b* GTCCGGAAGTATAACCTTCCAACAGGGGTCCGTCCAGAACAATCAAGTCCGAATTGAGC 357  
\*\*\*\*\*

*Cel-hsp-17a* AACAAATGGAGTGCTCACTGTCAAATATGAGAAGAATCAGGAACAGCAGCCAAAATCCATT 420  
*Cel-hsp-17b* AACAAATGGAGTGCTCACTGTCAAATATGAGAAGAATCAGGAACAGCAGCCAAAATCCATT 417  
\*\*\*\*\*

*Cel-hsp-17a* CCAATCACAATTGTGCCAAGAGAACTGA 450  
*Cel-hsp-17b* CCAATCACAATTGTGCCAAGAGAACTGA 447  
\*\*\*\*\*

**C**

*Sra-hsp-17.1* ATG---AACGACCGTTGGATGACTCCATTTGTCCGTGATCCTCTCTCTGTTTGTCC--AT 55  
*Sra-hsp-17.2* ATGTTTGACAACCACATGATGACACCATTCACTCGTATGCCACTTACCTCCTGTCCCTAC 60  
\*\*\* \*\* \* \* \* \* \* \* \* \* \* \* \* \* \* \* \* \* \* \* \* \* \* \* \* \* \* \* \* \* \*

*Sra-hsp-17.1* TAGGATACGGTGGACCAGCAAACCTCTTCAACGAGATGAACATGTT--GGAGCGTAAAT 113  
*Sra-hsp-17.2* AAGAGTA-AGTACGTCAATGAAT-----GGGAT---CGTGCTATGAAACGCTACAT 107  
\* \* \* \* \* \* \* \* \* \* \* \* \* \* \* \* \* \* \* \* \* \* \* \* \* \* \* \* \*

*Sra-hsp-17.1* GATGAACTCCCTCAACATGGTTGATCGTAATCTC--ACCAACAACATGGAACCTATGGAA 171  
*Sra-hsp-17.2* GGCTAATACTCTTT-CATGGGCAAACA-AATCTTTATGGAAAGCCATAAATTTGCTGAC 165  
\* \* \* \* \* \* \* \* \* \* \* \* \* \* \* \* \* \* \* \* \* \* \* \* \* \* \* \* \*

*Sra-hsp-17.1* CCATGTCCAGAGGTAGTAAATAACGACAAGGAATTCAGAGTCAAATGGATGTATCTCAC 231  
*Sra-hsp-17.2* ACCCACCAGATATTATCGACAATGACAAGGAATTCAAAGTCAAGATGGACGTATCACAC 225  
\* \* \* \* \* \* \* \* \* \* \* \* \* \* \* \* \* \* \* \* \* \* \* \* \* \* \* \* \*

*Sra-hsp-17.1* TATGGACCAAATGAATTGAAGGTTACCGTTAGAGATACTACCTCCAAGTTGAAGGAAAA 291  
*Sra-hsp-17.2* TTTAGTCCAGATGAATTGAAAGTACCTTCAGAGATGGATACCTCCAAGTTGAAGGTAAT 285  
\* \* \* \* \* \* \* \* \* \* \* \* \* \* \* \* \* \* \* \* \* \* \* \* \* \* \* \* \*

*Sra-hsp-17.1* CATGAAGAGAAAAGTACAAAATACGGAACCATCCAAGAAGTTTCGTCGGTAAATATGCT 351  
*Sra-hsp-17.2* CATGAAGAGAAAGTACAAAATATGGAACCATCCAAGAAGCTTTGTAAGAAGTATTCT 345  
\*\*\*\*\* \* \* \* \* \* \* \* \* \* \* \* \* \* \* \* \* \* \* \* \* \* \* \* \* \* \* \* \* \*

*Sra-hsp-17.1* CTCCAAAAGGACTCACAGAGGAGAATGTCAAAGTGAACCTACTAAGGACGGTGTCTCT 411  
*Sra-hsp-17.2* TTACCACCAAACCTTCAATGAAGACGACTCCGTCTGTGAGATTTCAAAGGATGGTGTTTTA 405  
\* \* \* \* \* \* \* \* \* \* \* \* \* \* \* \* \* \* \* \* \* \* \* \* \* \* \* \* \*

*Sra-hsp-17.1* ACAGTCGGAGGTAACAAGATGGCTATTGAGGACAAGAATGTCAAGACTGTCCCAATTGAA 471  
*Sra-hsp-17.2* ACTGTTGGAGTTGCCAAACTTGCCATCGGAGAGAAAAGGGAAAAAATATTCTTATCAAG 465  
\* \* \* \* \* \* \* \* \* \* \* \* \* \* \* \* \* \* \* \* \* \* \* \* \* \* \* \* \*

*Sra-hsp-17.1* TATAGAAAATAA 483  
*Sra-hsp-17.2* TTTA---AGTAA 474  
\* \* \* \* \* \* \* \* \* \* \* \* \* \* \* \* \* \* \* \* \* \* \* \* \* \* \* \* \*

Identity (64%)

**Fig. S3.** Alignment of the *Sra*-HSP-17.1 and *Sra*-HSP-17.2 aa sequences with other 12 related nematodes sHSPs based on CLUSTAL W, neighbor-joining. Sympols: identical (asterisks), highly conserved residues (>10) are shaded in black blocks, median conserved residues (7-9) in dark grey, low conserved residues (4-6) in light grey, no amino acid residue (dashes), conservation of residue size and hydropathy (colons), conservation of size or hydropathy (periods). Accession numbers are listed in Fig. 2.

|                      |                                                                   | Identity<br><i>Sra</i> -HSP-17.1/ <i>Sra</i> -HSP-17.2b |
|----------------------|-------------------------------------------------------------------|---------------------------------------------------------|
| <i>Sra</i> -HSP-17.1 | --MNDRWMTFVVRDPLSVCPLGYGGPALE NEMNMLERKM NSLNMV RNLNLMELMEPC      | (100%/49%)                                              |
| <i>Sra</i> -HSP-17.2 | MFDNHMMTFTRMPLTSCPYKSG--KYVNEW RAMKRYMANTLSWANKSLMESHKFADTH       | (49%/100%)                                              |
| <i>Sst</i> -HSP-17   | -----RAYWS KTLSEAHKFAEPS                                          | (59%/61%)                                               |
| <i>Cel</i> -HSP-17a  | -----MDRRFPFSPFFNHGRRFFDDVD---FDRHMIRPWADQTMLtGHRVG-DA            | (33%/35%)                                               |
| <i>Cel</i> -HSP-17b  | -----MDRRFPFSPFFNHG-RFFDDVD---FDRHMIRPWADQTMLtGHRVG-DA            | (33%/35%)                                               |
| <i>Cbr</i> -HSP-17   | -----MDRRFPAPFSPFFTPSRRFFDDVD---FDRHMIRPWADQTMLtGHRVG-DA          | (30%/34%)                                               |
| <i>Cre</i> -HSP-17   | -----MDRRFPAPFSPFFNHRRFFDDVD---FDRHMIRPWADQTMLtGHRVG-DA           | (30%/33%)                                               |
| <i>Tps</i> -sHSP     | MALTAWYNWVDDPFWPARPARFFEDLSRMIRSFDDMYRGMPAQMNMPMNELSMCG-NA        | (35%/27%)                                               |
| <i>Tsp</i> -sHSP     | MALTAWYNWVDDPFWPSRPARFFEDLSRMIRSFDDMYRGLPNQMNVPMNELSMCG-NA        | (35%/28%)                                               |
| <i>Llo</i> -sHSP     | MALLAFPTFSRWHNFPME---GRRTVGGMLNRLLEDFEDSMQPEWECATAG-----ENSL      | (21%/26%)                                               |
| <i>Avi</i> -sHSP     | MSLFRYNPRDYFFTSPMERFMVNFDDA DDKSLYRPLQAVAPWHLHQPVL ECNIGNTF       | (28%/29%)                                               |
| <i>Bma</i> -HSP-20   | MALLAFPSLSRWHNFPPIE---GRRTVGGMLNRLLEDFEDSLQPEWECSTTS-----KNSF     | (24%/26%)                                               |
| <i>Bpa</i> -sHSP     | MSVFRYNPRDYFYTSPMERFIVNLLDTDDR--YRPLQSVAPWHLNQPVL ECNIGNAL        | (25%/28%)                                               |
| <i>Ovo</i> -HSP-25-1 | MSLFRYNPRDYFYTSPMERFIVNLLDTDDR--SSRPLHSVAPWHLHQPVEL ECNIGNTL      | (26%/29%)                                               |
|                      |                                                                   |                                                         |
| <i>Sra</i> -HSP-17.1 | PEVNNND EFRVKMDVSHYCPNELKVTVRDNYLQVEGRHEEKTDK--G TIQRSEFVRKYA     |                                                         |
| <i>Sra</i> -HSP-17.2 | PDIIIDND EFKVKMDVSEFSPDELKVTFDGYLQVEGRHEEKSDEK--G TIQRSEFVRKYI    |                                                         |
| <i>Sst</i> -HSP-17   | SEIINNE EFKVKMDVSHFSPDELKVT KDKCLQVEGRHEEKTDK--F GTIQRSEFVRKYI    |                                                         |
| <i>Cel</i> -HSP-17a  | PDVNNNDQEYNVSDVSEPEPELKVIVDN ILIEGRHEEKTDK--G VEREFVRKYN          |                                                         |
| <i>Cel</i> -HSP-17b  | PDVNNNDQEYNVSDVSEPEPELKVIVDN ILIEGRHEEKTDK--G VEREFVRKYN          |                                                         |
| <i>Cbr</i> -HSP-17   | PDVIDSD EYNVSDVSEPEPELKVIVDN ILIEGRHEEKTDK--G VEREFVRKYN          |                                                         |
| <i>Cre</i> -HSP-17   | PDVVDSD EYNVSDVSEPEPELKVIVDN ILIEGRHEEKTDK--G VEREFVRKYN          |                                                         |
| <i>Tps</i> -sHSP     | AEVNNNDNKFEVSLDVKHEKPELTVKTTDNRLVITGRHEEKQDE--HCFVKREFSRSY        |                                                         |
| <i>Tsp</i> -sHSP     | SEVNNNDNKFEVSLDVKHEKPELTVKTTDNRLVITGRHEEKQDE--HCFVKREFSRSY        |                                                         |
| <i>Llo</i> -sHSP     | GEIIDEKENEGIQLDVNRERPELSVKMQDGRLLVEGHEBERNDR--HCSVEQEFIRKYT       |                                                         |
| <i>Avi</i> -sHSP     | GEVNVNEKDKFEIQ DVSEFHPPELSVSVDRRELIEGHEEKERTDQSGNCSIEREFIRKYV     |                                                         |
| <i>Bma</i> -HSP-20   | GEIVDNKDSFGIRLDVSEFHPPELSVKMQDGRLEVEGHEBERNDQ--HCSVEREFIRKYT      |                                                         |
| <i>Bpa</i> -sHSP     | GEVINEKDKFAIQVDVSEFHPPELSVSVDRRELSTEGHEEKERNDSGHCSIEREFIRKYV      |                                                         |
| <i>Ovo</i> -HSP-25-1 | GEVINEKDKFAVRADVSEFHPPELSVSVDRRELVIIEGHEEKERADSGHCSIEREFIRKYV     |                                                         |
|                      | : : : : : : * * : : * * * * * * * * : : * * * * * * * * : : * * : |                                                         |
|                      |                                                                   |                                                         |
| <i>Sra</i> -HSP-17.1 | LEKGLTEENVSELTKGVLTVGNKMAIEDKNVKTVPLEYRK-----                     |                                                         |
| <i>Sra</i> -HSP-17.2 | LEPNFNE DSVCEISKGVLTV VAKLA GEKKGK LPIKFK-----                    |                                                         |
| <i>Sst</i> -HSP-17   | LEPNVKEENVVSELXKCGILTI GSKLAVEDX-----                             |                                                         |
| <i>Cel</i> -HSP-17a  | LPTGVRPEQISELS NGVLTVKYEKNQeqQPKSIPITIVPK N-----                  |                                                         |
| <i>Cel</i> -HSP-17b  | LPTGVRPEQISELS NGVLTVKYEKNQeqQPKSIPITIVPK N-----                  |                                                         |
| <i>Cbr</i> -HSP-17   | LPTGVRPEQISELS NGVLTVKYEKNQeqLPKSIPITIVPK N-----                  |                                                         |
| <i>Cre</i> -HSP-17   | LPTGVRPEHISELS NGVLTVKYEKNQeqLPKSIPITIVPK N-----                  |                                                         |
| <i>Tps</i> -sHSP     | LPQGVKPEQFVSNLSPCKLVI tAPKHAIEG SNERKIPITAAPAAQKR-----            |                                                         |
| <i>Tsp</i> -sHSP     | LPQGVKPEQFVSNLSPCKLVI tAPKQAEIEG SNERKIPITAAPAAQKR-----           |                                                         |
| <i>Llo</i> -sHSP     | MPKNVLQDSLESLSLSDQGLLRITAKKKA VENSQFKLPIQFKSQDKQ-----             |                                                         |
| <i>Avi</i> -sHSP     | MPPEVQLDTIESELSDKGVLTICASKAT GSPAARNIPIRASPKPEPGAIQKSESNKEQ       |                                                         |
| <i>Bma</i> -HSP-20   | IPETVLQDSLESLSLSDQGVLRITAKKKA VENSQFQFTLPIQFNMSKSDK-----          |                                                         |
| <i>Bpa</i> -sHSP     | MPPEVQDTIESELSDKGVLTICATKTM GLPAARNIPIRASPKPEPEAGEKSASNGTGO       |                                                         |
| <i>Ovo</i> -HSP-25-1 | LPPEVQPTIESELSDKGVLTICANKTAVGTTASRNIPIRASPKPEPEAKQKTKKQ----       |                                                         |
|                      | : * . : . : . * * : *                                             |                                                         |

**Fig. S4.** Alignment of the cloned and sequenced PCR products amplified from the PF cDNA and gDNA. Symbols: identical (asteriks) and introns (underlined). (A) *Sra-hsp-17.1*. (B) *Sra-hsp-17.2*. A single intron in each sHSP located in the second third of the ACDs ORFs. Both introns are phase 0, their splice sites sequences followed the GU-AG convention.

**A**

```

gSra-hsp-17.1      ATGAACGACCGTTGGATGACTCCATTTGTCCGTGATCCTCTCTCTGTTTGTCCATTAGGA 60
cSra-hsp-17.1      ATGAACGACCGTTGGATGACTCCATTTGTCCGTGATCCTCTCTCTGTTTGTCCATTAGGA 60
*****

gSra-hsp-17.1      TACGGTGGACCAGCAAACCTCTTCAACGAGATGAACATGTTGGAGCGTAAATGATGAAC 120
cSra-hsp-17.1      TACGGTGGACCAGCAAACCTCTTCAACGAGATGAACATGTTGGAGCGTAAATGATGAAC 120
*****

gSra-hsp-17.1      TCCCTCAACATGGTTGATCGTAATCTCACCAACAACATGGAACCTTATGGAACCATGTCCA 180
cSra-hsp-17.1      TCCCTCAACATGGTTGATCGTAATCTCACCAACAACATGGAACCTTATGGAACCATGTCCA 180
*****

gSra-hsp-17.1      GAGGTAGTAAATAACGACAAGGAATTCAGAGTCAAATGGATGTATCTCACTATGGACCA 240
cSra-hsp-17.1      GAGGTAGTAAATAACGACAAGGAATTCAGAGTCAAATGGATGTATCTCACTATGGACCA 240
*****

gSra-hsp-17.1      AATGAATTGAAGGTTACCGTTAGAGATAACTACCTCCAAGTTGAAGGAAAACATGAAGAG 300
cSra-hsp-17.1      AATGAATTGAAGGTTACCGTTAGAGATAACTACCTCCAAGTTGAAGGAAAACATGAAGAG 300
*****

gSra-hsp-17.1      AAAACTGACAAATACGGAACCGTAAGTTTACTTTATACCTCTAAGTATTTAACTGTGGTA 360
cSra-hsp-17.1      AAAACTGACAAATACGGAACC-----ATCCAAAGAAGTTTCGTCCGTAATATGCTCTCCCA 321
*****

gSra-hsp-17.1      AAATCTATTCCTTTTAAATTTTAGATCCAAAGAAGTTTCGTCCGTAATATGCTCTCCCA 420
cSra-hsp-17.1      -----ATCCAAAGAAGTTTCGTCCGTAATATGCTCTCCCA 357
*****

gSra-hsp-17.1      AAAGGACTCACAGAGGAGAATGTCAAAGTGAACCTTACTAAGGACGGTGTCTCACAGTC 480
cSra-hsp-17.1      AAAGGACTCACAGAGGAGAATGTCAAAGTGAACCTTACTAAGGACGGTGTCTCACAGTC 417
*****

gSra-hsp-17.1      GGAGGTAACAAGATGGCTATTGAGGACAAGAATGTCAAGACTGTCCCAATTGAATATAGA 540
cSra-hsp-17.1      GGAGGTAACAAGATGGCTATTGAGGACAAGAATGTCAAGACTGTCCCAATTGAATATAGA 477
*****

gSra-hsp-17.1      AAATAA 546
cSra-hsp-17.1      AAATAA 483
*****

```

B

*gSra-hsp-17.2* ATGTTTGACAACCACATGATGACACCATTCACTCGTATGCCACTTACCTCCTGTCCCTAC 60  
*cSra-hsp-17.2* ATGTTTGACAACCACATGATGACACCATTCACTCGTATGCCACTTACCTCCTGTCCCTAC 60  
\*\*\*\*\*

*gSra-hsp-17.2* AAGAGTAAGTACGTCAATGAATGGGATCGTGCCTATGAAACGCTACATGGCTAATACTCTT 120  
*cSra-hsp-17.2* AAGAGTAAGTACGTCAATGAATGGGATCGTGCCTATGAAACGCTACATGGCTAATACTCTT 120  
\*\*\*\*\*

*gSra-hsp-17.2* TCATGGGCAAACAAATCTCTTATGGAAAGCCATAAATTTGCTGACACCCACCCAGATATT 180  
*cSra-hsp-17.2* TCATGGGCAAACAAATCTCTTATGGAAAGCCATAAATTTGCTGACACCCACCCAGATATT 180  
\*\*\*\*\*

*gSra-hsp-17.2* ATCGACAATGACAAGGAATTCAAAGTCAAGATGGACGTATCACACTTTAGTCCAGATGAA 240  
*cSra-hsp-17.2* ATCGACAATGACAAGGAATTCAAAGTCAAGATGGACGTATCACACTTTAGTCCAGATGAA 240  
\*\*\*\*\*

*gSra-hsp-17.2* TTGAAAGTCACCTTCAGAGATGGATACTCCAAGTTGAAGGTAATCATGAAGAGAAGAGT 300  
*cSra-hsp-17.2* TTGAAAGTCACCTTCAGAGATGGATACTCCAAGTTGAAGGTAATCATGAAGAGAAGAGT 300  
\*\*\*\*\*

*gSra-hsp-17.2* GACAAATATGGAACCGTAAGTTTATGCTACTTACTTAGTGTGTTATCTTATTCGTTTT 360  
*cSra-hsp-17.2* GACAAATATGGAAC----- 315  
\*\*\*\*\*

*gSra-hsp-17.2* TAAGATCCAAAGAAGCTTTGTAAGAAAGTATTCTTTACCACCAAACCTCAATGAAGACGA 420  
*cSra-hsp-17.2* ---ATCCAAAGAAGCTTTGTAAGAAAGTATTCTTTACCACCAAACCTCAATGAAGACGA 371  
\*\*\*\*\*

*gSra-hsp-17.2* CTCCGTCTGTGAGATTTCAAAGGATGGTGTGTTTAACTGTTGGAGTTGCCAAACTTGCCAT 480  
*cSra-hsp-17.2* CTCCGTCTGTGAGATTTCAAAGGATGGTGTGTTTAACTGTTGGAGTTGCCAAACTTGCCAT 431  
\*\*\*\*\*

*gSra-hsp-17.2* CGGAGAGAAAAAGGGAAAAAATATTCCTATCAAGTTTAAGTAA 523  
*cSra-hsp-17.2* CGGAGAGAAAAAGGGAAAAAATATTCCTATCAAGTTTAAGTAA 474  
\*\*\*\*\*

**Fig. S5.** Cross-reactivities in ELISAs titration of the (A) 1:3000 immune sera and (B) 1:300 purified antibodies against the respective *Sra*-HSP-17s, by using the recombinant *Sra*-HSP-17s as antigens. Sera from mock-immunized rats (1:50) served as controls.

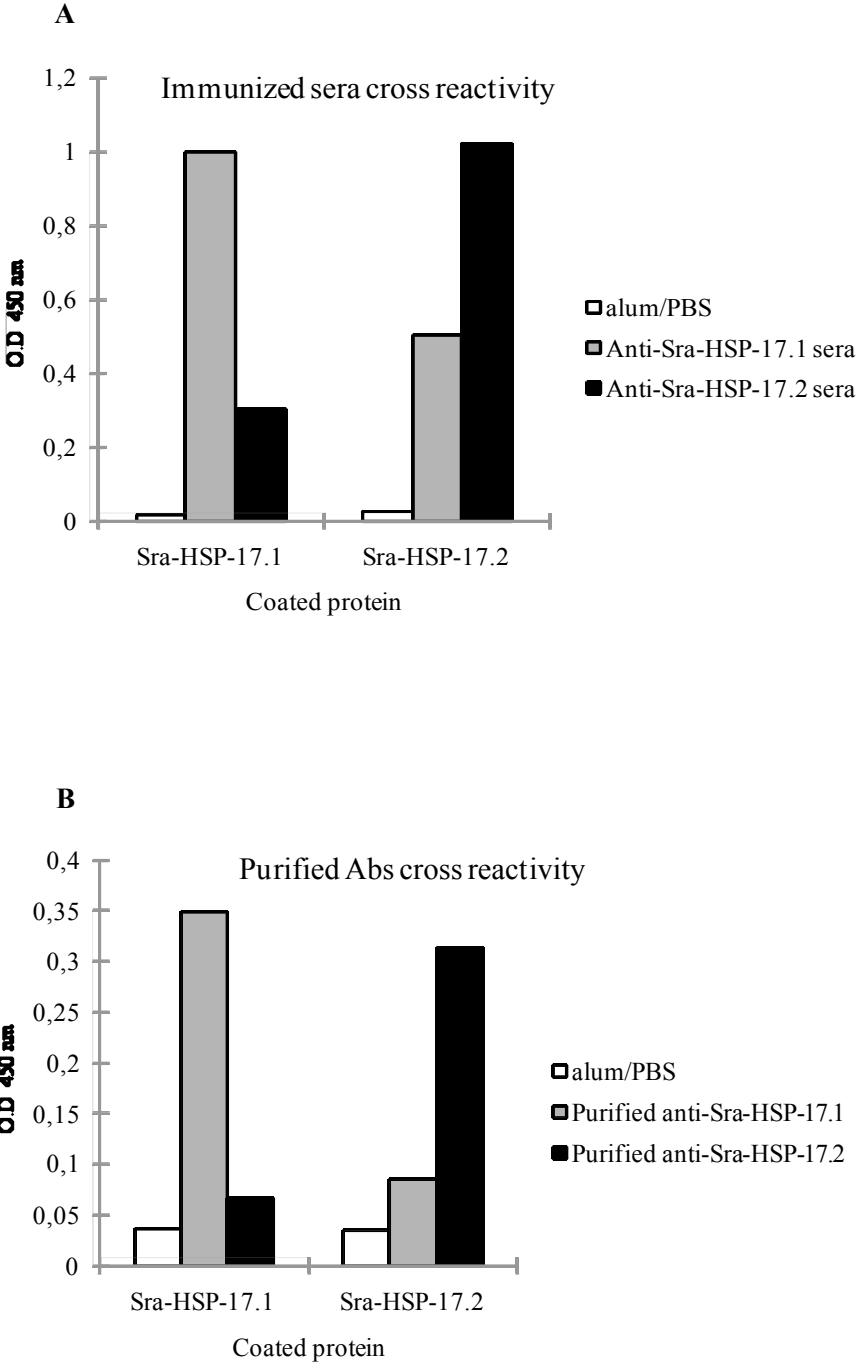

Supplement: NIHMS479746-supplement-Supp_Material_S1.pdf [file NIHMS479746-supplement-Supp_Material_S1.pdf]
